# Supplementary material for: The taxonomy of a new parvicursorine alvarezsauroid specimen IVPP V20341 (Dinosauria: Theropoda) from the Upper Cretaceous Wulansuhai Formation of Bayan Mandahu, Inner Mongolia, China
Source: PeerJ. 2015 Jun 9;3:e986. doi: 10.7717/peerj.986 (PMC4465946; doi:10.7717/peerj.986)
Supplement: Table S1 — Taxon data for known alvarezsauroid theropods. [file peerj-03-986-s001.xlsx]

## Sheet: Table S1 - Taxon info
Taxon	Specimen number	Age	Locality and horizon	Geology and palaeoenvironment	Elements preserved	Palaeolocation (including from fossilworks.org)
Alnashetri cerropoliciensis (Makovicky et al. 2012)	MPCA 477	Cenomanian-Turonian, Upper Cretaceous (Leanza et al., 2004); lower Cenomanian (Garrido 2010; Rougier et al. 2011)	‘‘Hoyada de los esfenodontes’’ sublocality, La Buitrera locality, ~30 km south El Chocόn village, Río Negro province, Argentina (39'25'04.01''S 68'37'14.42''W); Upper part of the Candeleros Formation, close to the contact with the Huincul Formation. Both formations are part of the Río Liya Subgroup, Neuquén Group.	Massive red sandstone - massive nature possibly related to rapid overbank flooding events (Apesteguía, 2008); red colour suggests a semi-arid depositional environment.	Partial left femur, distal portions of left and right tibiae, right fibula, proximal tarsals of both ankles, near complete right metatarsus, proximal and distal parts of the left metapodials, left pedal digit III.	?
Achillesaurus manazzonei (Martinelli & Vera, 2007)	MACN-PV-RN 1116	Santonian, Upper Cretaceous (Bonaparte 1991; Leanza & Hugo 2001)	Paso Córdova, Río Negro Province, Argentina (est. 39.1° S, 67.6° W); Bajo de la Carpa Formation, Río Colorado Subgroup, Neuquén Group.	Reddish sandstones; fluvial depostional environment.	Last sacral vertebra and the following two procoelous caudals with an articulated chevron, a partial proximal biconcave caudal (possibly the fourth in the series), distal caudal centrum fragment, left ilium, proximal end of the left femur, distal end of the left tibia articulated with the astragalus, proximal portion of the left metatarsals II, III, and IV, and cast of the ilium and the vertebrae…	Est. 43.7° S, 48.5° W
Albertonykus borealis (Longrich & Currie, 2008)	TMP 1999.50.110,2000.45.8, 2000.45.61. 2000.45.85, 2000.45.86, 2000.45.97 2000.45.31, 2001.45.91, 2002.45.12, 2003.58.8, 2003.45.51; UALVP 48636	Early Maastrichtian, Upper Cretaceous	Dry Island Buffalo Jump Provincial Park (Albertosaurus quarry, Big Valley Creek), Alberta, Canada (52.0° N, 112.9° W); upper beds (B member [from transitions between units 4 and 5]) of the Horseshoe Canyon Formation, Edmonton Group.	Coarse channel fill - "a small alluvial channel, 2 m deep and 15 m wide". The Horseshoe Canyon Formation (Late Campanian to Early Maastrichtian, Upper Cretaceous) comprises of sandstones, mudstones, and coals deposited in fluvial and estuarine environments (Lerbekmo & Braman, 2002; Brinkman, 2003; Wu et al., 2007). Cool climate - cooler than relatively cool and wet Late Campanian times (Brinkman …	Left ulna (TMP 2001.45.91), manual ungual I (TMP 2000.45.86), right tibia (TMP 2000.45.98), proximal end of left tibia (TMP 2000.45.31), right metatarsal III (TMP 2002.45.12), proximal end of metatarsal II or IV (TMP 2000.45.85), pedal phalanx II-1 (TMP 2000.45.61), pedal phalanx III-1 (TMP 2000.45.8), pedal phalanx III-3 (TMP 1999.50.110), pedal phalanx IV-1 (UALVP 48636), pedal phalanx III-2? (…	59.7° N, 84.4° W (Alberta, Canada). Bordered the Western Interior Seaway.
Albinykus baatar (Nesbitt et al. 2011)	MPC 100/3004	Santonian-Campanian?, Upper Cretaceous (Eberth et al., 2009)	Shine Us Khudag redbeds at Khugenetslavkant, eastern Gobi Desert, Mongolia (44.4° N, 109.4° E); Javkhlant Formation.	Poorly sorted red sandstone lens containing lithic clasts, fragments of dinosaur egg shell and isolated Yamaceratops elements; semi-arid fluvial depositional environment.	Articulated hindlimbs consisting of portions of the right ilium, partial ischium, fragmentary right femur, nearly complete right tibia and nearly complete left, proximal portion of left and right fibulae, complete right and left pedes.	Est. 44.6° N, 98.8° E (Dornogov, Mongolia)
Alvarezsaurus calvoi (Bonaparte, 1991)	MUCPv 54	Santonian, Upper Cretaceous	Boca del Sapo, Neuquén Province, Argentina (est. 39.0° S, 68.2° W); Rio Colorado Subgroup, Neuquén Group, Bajo de la Carpa Formation.	Predominantly composed of medium to fine, friable, whitish gray to pink sandstones, generally made of clean quartz with very little clay (from Chiappe & Calvo, 1994); fluvial-deltaic depositional environment.	Several cervical and thoracic vertebrae, incomplete synsacrum, 13 caudals, right ilium and a fragment of the left ilium, portions of scapula and coracoid, segments of the hindlimb elements (including pedal phalanges), and a phalanx interpreted as a maunal ungual.	Est. 43.5° S, 49.2° W
Alvarezsauridae (Salgado et al. 2009)	MPCA 166-168, 170-193,	Mid-Campanian -Maastrichtian, Upper Cretaceous (Salgado et al., 2007)	Yacimiento ‘Arriagada III’ (39°25’55”S; 67°17’40”O), Salitral Ojo de Agua, Río Negro, Argentina; ‘Nivel de huevos 2’, Allen Formation.	?	?	?
Alvarezsauridae (Novas 1997)	MCF-PVPH 38	Possibly Turonian, Upper Cretaceous (Cruz et al. 1989)	500m NW of National Route 22, Sierra del Portezuelo, 22km west of Plaza Huincal, Neuquén Province, Argentina; Portezuelo Member of the Río Neuquén Formation.	Sandstone; fluvial depositional environment.	Incomplete 5th? cervical vertebra and incomplete right postzygapophysis of an indeterminate cervical.	?
BMNH A4359 'Heptasteornis andrewsi' (Naish & Dyke 2004)	BMNH A4359	Upper Cretaceous	Sînpetru, Haţeg Basin, Romania.	?	Distal tibotarsus	?
Bonapartenykus ultimus (Agnolin et al. 2012)	MPCA 1290; MGPIFD-GR 166 and 184	Campanian-Maastrichtian, Upper Cretaceous (Martinelli & Forasiepi, 2004).	Salitral Ojo de Agua locality, Río Negro province, Argentina (MPCA 1290) (est. 39.5° S, 55.7° W); Upper levels of the Allen Formation.	Fluvial sandstones; fluvial depositional environment	A nearly articulated but badly preserved partial skeleton consisting of an incomplete mid-dorsal vertebra, a nearly complete left scapulocoracoid, an incomplete right scapulocoracoid, am incomplete left tibia and femur, a nearly complete left pubis articulated with the incomplete pubic peduncle of the ilium, and the anterior blade of the left ilium. Associated with two partially-preserved eggs lo…	Est. 43.1° S, 41.2° W (MPCA 1290)
	?	?	Salitral Ojo de Agua (Arriagada III) locality, Río Negro province, Argentina (est. 39.4° S, 67.3° W); Upper levels of the Allen Formation.	?	?	Est. 42.1° S, 53.4° W
Ceratonykus oculatus (Alifanov & Barsbold, 2009)	MPC 100/124	Lower Santonian?, Upper Cretaceous (Alifanov & Barsbold 2009)	Khermiin Tsav (Khermeen Tsav), Nemegt Depression, Omnögöv Aimag, Mongolia (43.2° N, 99.5° E); Barun Goyot (Baruungoyot, Barungoiotian) Formation.	?	Incomplete skull including a partial lower jaw, several cervical and caudal vertebrae, sternum, both coracoids, a right humeral fragment, distal forelimb elements, a fragmentary ilium, and the hindlimbs.	40.1° N, 89.1° E
Haplocheirus sollers (Choiniere et al. 2010)	IVPP V15988	Oxfordian, Upper Jurassic (158.7 ±0.3 and 161.2 ± 0.2 Ma [Clark et al. 2006])	Wucaiwan area, Junggar Basin, Xinjiang, China (est. 45.2° N, 88.9° E); upper part of the Shishugou Formation.	Orange mudstone beds	Near complete skeleton.	Est. 46.6° N, 91.2° E
IVPP V20341 (Pittman et al. 2015 [this study])	IVPP V20341	Campanian, Upper Cretaceous (Jerzykiewicz et al. 1993; Eberth 1993)	~3km SE of ‘The Gate’ locality of Bayan Mandahu, north of the city of Linhe, Inner Mongolia, China (41°43'15.3"N, 106°44'43.3"E). IVPP V20341 was found close to the location of Eberth’s (1993) ‘7/12/90/2’ stratigraphic section, but not as far North as his ‘7/12/90/1’ section. The locality lies within an larger area that Jerzykiewicz et al. (1993) called the ‘South Escarpment’ locality, but the sp…	Cliff top exposure of a fine-grained, red structureless aeolian quartz arenite; zone 1 palaeographic zone of Eberth (1993): alluvial, lacustrine and aeolian sediments deposited in a distal alluvial fan or braid-plain environment adjacent to an aeolian dune field.	A highly fragmentary postcranial skeleton comprising of an articulated series of: 4 partial anterior cervical vertebrae, an isolated anterior portion of an anterior cervical vertebra; 4 isolated fragmentary anterior caudal vertebrae; a potential partial left scapula; various possible pedal phalanges, including unknown digit II/III and IV phalanges, a right II-1, II-2, and IV, as well as a potenti…	Est. 39.6° N, 96.0° E (based on palaeolocation of Linhenykus, IVPP V 17608)
Kol ghuva (Turner et al. 2009)	MPC 100/2001	Campanian, Upper Cretaceous (Dashzeveg et al., 1995; Dingus et al., 2008)	Big Mamma sublocality of Ankylosaur Flats locality (Dingus et al., 2008), Ukhaa Tolgod, Omnögöv Aimag, Mongolia.	Ankylosaur flats: predominantly structureless sandstone with outcrops of cross-bedded aeolian sandstone and structureless flat-bedded sandstone (Dingus et al., 2008).	A complete pes, including: an indeterminate distal tarsal, MT I-IV and their associated digit,s and a partial MTV.	Ukhaa Tolgod: 40.9° N, 90.0° E (Omnögöv Aimag, Mongolia)
Linhenykus monodactylus (Xu et al. 2010)	IVPP V17608	Campanian, Upper Cretaceous (Jerzykiewicz et al. 1993; Eberth 1993)	'Gate' locality at Bayan Mandahu, north of the city of Linhe, Inner Mongolia, China (41.7° N, 106.7° E); Wulansuhai Formation.	Found on a low outwash plain east of the high cliffs at the 'Gate' locality. Specimen was fully exposed on a surface of extensively weathered red massive sandstone directly below a thick, resistant sandstone layer (less than 1 m in thickness) with numerous calcite-rich concretions.	A partial postcranial skeleton including cervical, dorsal, sacral, and caudal vertebrae, the left scapulocoracoid, a nearly complete sternum, much of the forelimbs, a partial pelvis, nearly complete hindlimbs, and some unidentified fragments.	39.6° N, 96.0° E
	IVPP V18190	Campanian, Upper Cretaceous (Jerzykiewicz et al. 1993; Eberth 1993)	Gate' locality at Bayan Mandahu, north of the city of Linhe, N41 44’31.3”, E10644’42.4” (close to the locality of IVPP V17608), Inner Mongolia, China; Wulansuhai Formation.	A small, partially eroded, sandstone nodule.	A partial distal left pes, including a complete pedal digit I, the distal ends of MTII, III, and IV, and pedal phalanges II-1, II-2, partial II-3, III-1, and IV-1 to 3.	39.6° N, 96.0° E (based on specimen IVPP V17608)
Mononykus olecranus (Perle et al. 1993)	MPC 107/6	Mid-Maastrichtian, Upper Cretaceous (Jerzykiewicz & Russell, 1991)	Bugin Tsav (Buguin Tzav), South Gobi Aimak, Mongolia (43.5° N, 99.6° E); Nemegt Formation.	Variegated but mainly reddish sandstones; aeolian and alluvial depositional environment.	A fragmentary skull preserving the braincase, a portion of the right maxilla, and a tooth; eight cervical and eight dorsal vertebrae; the first, second (partial) and last synsacral vertebrae; a proximal caudal vertebra; both forelimbs, incomplete left coracoid, both scapulae, and the sternum; proximal ends of 3 ribs; acetabular portion of left ilium and both proximal portions of the pubes; both f…	41.3° N, 88.8° E (Omnögöv Aimag, Mongolia)
	Andrews 1932	Campanian, Upper Cretaceous (Dashzeveg et al. 2005)	Bayn Dzak (Bayan Zag, Shabarakh Usu, Flaming Cliffs), Omnögöv Aimag, Mongolia (44.2° N, 103.7° E); Bayn Dzak Member, Djadokhta Formation.	Reddish sandstone; aeolian and alluvial depositional environment.	?	41.8° N, 92.7° E (Omnögöv Aimag, Mongolia)
Montanan mononykine (Hutchinson & Chiappe 1998)	UCMP 154584	Upper Cretaceous (palynology; Hotto, 1988). Correlated with late Maastrichtian marine strata. Lancian faunal stage.	Sandstone Basin locality (UCMP V80092), Garfield County, Montana, USA (47.6° N, 107.4° W); Hell Creek Formation.	Coarse sandstone channel fill; fluvial depositional enviroment.	Right pubis and partial ischium.	54.5° N, 80.5° W (Garfield County, Montana, USA)
Parvicursor remotus (Karhu & Rautian 1996)	PIN 4487/25	Middle (Upper) Campanian, Upper Cretaceous	Khulsan (Chulsan) locality, South Gobi Aimak, Mongolia; Barun Goyot (Barungoiotian) Formation.	?	Incomplete skeleton: fragments of dorsal, sacral, and caudal vertebrae; partial pelvis; right hindlimb, except for first and third digit; separate elements of left hindlimb.	?
	MPC 100/99 (referred from Mononykus by Longrich & Currie 2009)	Campanian, Upper Cretaceous (Jerzykiewicz & Russell, 1991; Gao & Norell, 2000)	Tögrögiin Shiree (Tugrugeen Shireh, Tugrig Shire, Toogreeg Shire,Tugrikin Shire), Omnögöv Aimag, Mongolia (44.2° N, 103.3° E); Djadokhta Formation.	Coarse-grained, red sandstone; aeolian and alluvial depositional environment.	A skull fragment and articulated postcranial skeleton lacking the cervical vertebrae, thoracic girdle and proximal forelimb elements.	41.8° N, 92.3° E (Omnögöv Aimag, Mongolia)
	MPC 100/120 (referred from Mononykus by Longrich & Currie 2009)	Campanian, Upper Cretaceous (Jerzykiewicz & Russell, 1991; Gao & Norell, 2000)	Tögrögiin Shiree (Tugrugeen Shireh, Tugrig Shire, Toogreeg Shire,Tugrikin Shire), Omnögöv Aimag, Mongolia (44.2° N, 103.3° E); Djadokhta Formation.	Coarse-grained, red sandstone; aeolian and alluvial depositional environment.	A partial skeleton preserving a portion of the skull including nearly complete mandibular rami; most cervical (6+), dorsal, and caudal (22) vertebrae; portions of the scapula, coracoid, and ilium; fragments of forelimb elements and a complete manus; distal ends of femora; most of the remaining hindlimb bones.	41.8° N, 92.3° E (Omnögöv Aimag, Mongolia)
Patagonykus puertai (Novas 1997; Chiappe & Coria 2003)	MCF-PVPH 102	Upper Cretaceous, possibly the Turonian stage like holotype (Novas 1997; Chiappe & Coria 2003)	Northern shore of Los Barriales lake, approximately 80km North of Plaza Huincal, Neuquén Province, Argentina (est. 38.9° S, 69.6° W); Neuquén Group (possibly the Portezuelo Member of the Río Neuquén Formation [Novas 1997] like the holotype [Chiappe & Coria 2003]).	?	Articulated phalanx 1 and 2 (ungual) of the left manual digit I.	?
	MCF-PVPH37	Possibly Turonian, Upper Cretaceous (Cruz et al. 1989); Coniacian-Santonian, Upper Cretaceous (Legaretta & Gulsiano 1989)	500m NW of National Route 22, Sierra del Portezuelo, 22km west of Plaza Huincal, Neuquén Province, Argentina; Portezuelo Member of the Río Neuquén Formation.	Sandstone; fluvial depositional environment.	Two incomplete dorsal vertebrae, incomplete sacrum, two proximal and two distal caudal vertebrae; two incomplete coracoids, proximal and distal ends of both humerii, right proximal portions of ulna and radius, and distal portion of left ulna, articulated carpometacarpus and first phalanx of digit I of the right manus; incomplete ungual phalanx possibly from digit I; portions of ilia, proximal end…	?
Shuuvuia deserti (Chiappe et al. 1998)	MPC 100/975, MPC 100/99 (referred to Parvicursor sp. by Longrich & Currie 2009), MPC 100/1001, MPC 100/977, MPC 100/120 (referred to Parvicursor sp. by Longrich & Currie 2009), MPC 100/1305	Campanian, Upper Cretaceous (Jerzykiewicz & Russell, 1991; Gao & Norell, 2000)	Ukhaa Tolgod (MPC 100/975, MPC 100/977, MPC 100/1001), Omnögöv Aimag, Mongolia (43.7° N, 100.9° E) and Tögrögiin Shiree (Tugrugeen Shireh, Tugrig Shire, Toogreeg Shire,Tugrikin Shire) (MPC 100/99, 100/120), Omnögöv Aimag, Mongolia (44.2° N, 103.3° E); Djadokhta Formation.	Tögrögiin Shiree: Coarse-grained, red sandstone; aeolian and alluvial depositional environment.	Partially complete postcranium including 9 cervical vertebrae, several thoracic vertebrae, synsacrum and 19 caudal vertebrae; portions of the forelimb and thoracic girdle; ilium and proximal portions of the ischium and pubis; portions of femur and tibiotarsus, complete metatarsals, and several pedal phalanges (MPC 100/975); A skull fragment and articulated postcranial skeleton lacking the cervica…	Ukhaa Tolgod: 40.9° N, 90.0° E (Omnögöv Aimag, Mongolia); Tögrögiin Shiree: 41.8° N, 92.3° E (Omnögöv Aimag, Mongolia)
	Chiappe et al. (2007)	?	?	Dune; poorly lithified, burrowed, fine-grained, red, white sandstone • aeolian dune, erg • "yellowish-white sandstones"; "Tugrik sandstones are compositionally and texturally sub-mature. They are generally poorly consolidated, moderately well-sorted, fine-grained, sub-rounded to well-rounded, and present a 'frosted' appearance. Colors vary from pink (induced by minor amounts of haematite), to whi…	?	?
Xixianykus zhangi (Xu et al. 2010)	XMDFEC V0011, IVPP FV1788 (cast)	Late Coniacian to Santonian, Upper Cretaceous (based on invertebrate and plant fossils, including bivalves, gastropods, conchostracans, and ostracods (Wang et al. 2008)	Zhoujiagou, Yangcheng, Xixia County, Henan Province (33.3° N, 111.5° E), China; Majiacun Formation.	?	A partial, articulated postcranial skeleton, including: five posterior dorsal vertebrae, the complete synsacrum, two anterior caudal vertebrae, a few dorsal ribs and gastralia, both ilia, the right pubis and ischium, and the majority of the right hindlimb.	32.8° N, 103.9° E
YPM 1049 'Ornithomimus minutus' (Marsh 1892)	YPM 1049 (discussed in Hutchinson & Chiappe 1998)	Late Maastrichtian, Upper Cretaceous	Wyoming, USA; Lance Formation	?	MT III	?
