# Supplementary material for: The taxonomy of a new parvicursorine alvarezsauroid specimen IVPP V20341 (Dinosauria: Theropoda) from the Upper Cretaceous Wulansuhai Formation of Bayan Mandahu, Inner Mongolia, China
Source: PeerJ. 2015 Jun 9;3:e986. doi: 10.7717/peerj.986 (PMC4465946; doi:10.7717/peerj.986)
Supplement: Table S2 — Estimates of alvarezsauroid theropod body size and their associated measurements. [file peerj-03-986-s002.xlsx]

## Sheet: Table S2 - Body size data
					Body mass in kg			Body length in m
Taxon	Ontogenetic stage	Skull length (m)	Femoral length (m)	Long-bone diaphyseal circumferences (m)	Christiansen & Fariña (2004)	Therrien & Henderson (2007)	Anderson et al. (1985)	Therrien & Henderson (2007)	Turner et al. (2007)
Achillesaurus manazzonei (MACN-PV-RN 1116)	Subadult (completely closed neurocentral sutures; Martinelli & Vera 2007)	-	Proximal end of left femur	-	-	-	-	-	-
Albertonykus borealis (TMP 2001.45.91)	-	-	-	-	-	-	-	-	-
Albinykus baatar (MPC 100/3004)	Subadult? (~2 years old based on the histology of the left tibia, fully grown when 3 years old; proximal tarsals completely co-ossified to each other and to the tibiae with no visible sutures; distal tarsals form a cap that is co-ossified to the fused proximal portions of the metatarsals; fused astragalocalcaneum that is fused to the tibia; Nesbitt et al. 2011)	-	0.065 (Nesbitt et al. 2011)	-	0.7-1.0 (Nesbitt et al. 2011)	-	-	-	-
Alnashetri cerropoliciensis (MPCA 477)	Unclear in the absence of histological data; Makovicky et al.2012	-	Left femur without distal end	-	-	-	-	-	-
Alvarezsaurus calvoi (MUCPv 54)	-	-	Proximal half of right femur	-	-	-	-	-	-
BMNH A4359 'Heptasteornis andrewsi'	-	-	-	-	-	-	-	-	-
Bonapartenykus ultimus (MPCA 1290)	Adult? (two eggs associated with skeleton; Agnolin et al. 2012)	-	Left femur without distal end	-	-	-	-	-	-
Ceratonykus oculatus (MPC 100/124)	Adult (fusion of astragali and tibiae, with partially obliterated sutures; Alifanov & Barsbold 2009)	0.06 (Alifanov & Barsbold 2009)	0.046 (broken; Alifanov & Barsbold 2009)	-	-	0.11 (Choiniere et al. 2010)	-	0.80 (Choiniere et al. 2010)	-
Haplocheirus sollers (IVPP V15988)	Young adult or late stage subadult (braincase is co-ossified and neurocentral sutures are visible; Choiniere et al. 2010)	0.2128 (Choiniere et al. 2010)	0.2143 (right; Choiniere et al. 2010)	-	4.80-58.2 (Choiniere et al. 2010)	10.56 (Choiniere et al. 2010)	-	2.3 (Choiniere et al. 2010)	1.9 (Choiniere et al. 2010)
IVPP V20341	Subadult or adult? (at or near skeletal maturity because the neurocentral sutures on the vertebrae preserved appear to be completely closed; Pittman et al. 2015 (this study))	-	-	-	-	-	-	-	-
Linhenykus monodactylus (IVPP V17608)	Subadult rather than adult (vertebrae have completely closed neurocentral sutures; intercentral sutures between successive sacral vertebrae; metacarpal III is not fused to metacarpal II, and the proximal tarsals are not completely co-ossified with the tibia; Xu et al. 2013)	-	0.070 (Xu et al. 2013)	-	0.45 (Xu et al. 2013)	-	-	-	-
Mononykus olecranus (MPC 107/6)	-	Complete skull	0.1386 (Perle et al. 1993)	-	1.18-14.7 (Choiniere et al. 2010)	-	-	-	1.2 (Choiniere et al. 2010)
Montanan mononykine (UCMP 154584)	-	-	-	-		-	-	-	-
Parvicursor remotus (PIN 4487/25)	Subadult or adult? (completely closed neurocentral sutures; fusion of the two sacral vertebrae; proximal tarsals and tibia are co-ossified as well as the distal tarsals and metatarsals; Karhu & Rautian 1996)	-	0.0526 (Karhu & Rautian 1996)	-	0.053-0.614 (Choiniere et al. 2010)	-	-	-	0.43 (Choiniere et al. 2010)
Patagonykus puertai (MCF-PVPH37)	-	-	0.27-30 (estimated from Mononykus (MPC 107/6) by Nesbitt et al. 2011)	-	30-40 (Nesbitt et al. 2011)	-	-	-	-
Shuvuuia deserti (MPC 100/99?, 100/120?, 100/975, 100/1001)	Subadult or young adult? (~3 years old based on femoral histology of MPC 100/99 (referred to Parvicursor sp. by Longrich & Currie 2009); 4 years is estimated as age when fully grown; Erickson et al. 2001)	0.0821 (MPC 100/1001; estimated by Choiniere et al. (2010) from Chiappe et al. (1998))	Incomplete femora (MPC 100/99, 100/120, 100/975)	-	-	0.3417 (Choiniere et al. 2010)	1.7 (Erikson et al. 2001)	1.04 (Choiniere et al. 2010)	-
Xixianykus zhangi (XMDFEC V0011)	Subadult or young adult? (Sacral vertebrae fused into a synsacrum; astragalus and calcaneum are co-ossified together and also with the tibia; distal tarsals and metatarsals are co-ossifed into a tarsometatarsus; neurocentral sutures visible on vertebrae; Xu et al. 2010)	-	0.0701 (Xu et al. 2010)	-	-	-	-	-	-
YPM 1049 'Ornithomimus minutus'	-	-	-	-	-	-	-	-	-
